# Supplementary material for: Carboxypeptidase inhibitors from Solanaceae as a new subclass of pathogenesis related peptide aiming biotechnological targets for plant defense
Source: Frontiers journal article supplement (doi:10.3389/fmolb.2023.1259026), 2023-11-16
Supplement: Image_1.pdf [file Image_1.pdf]

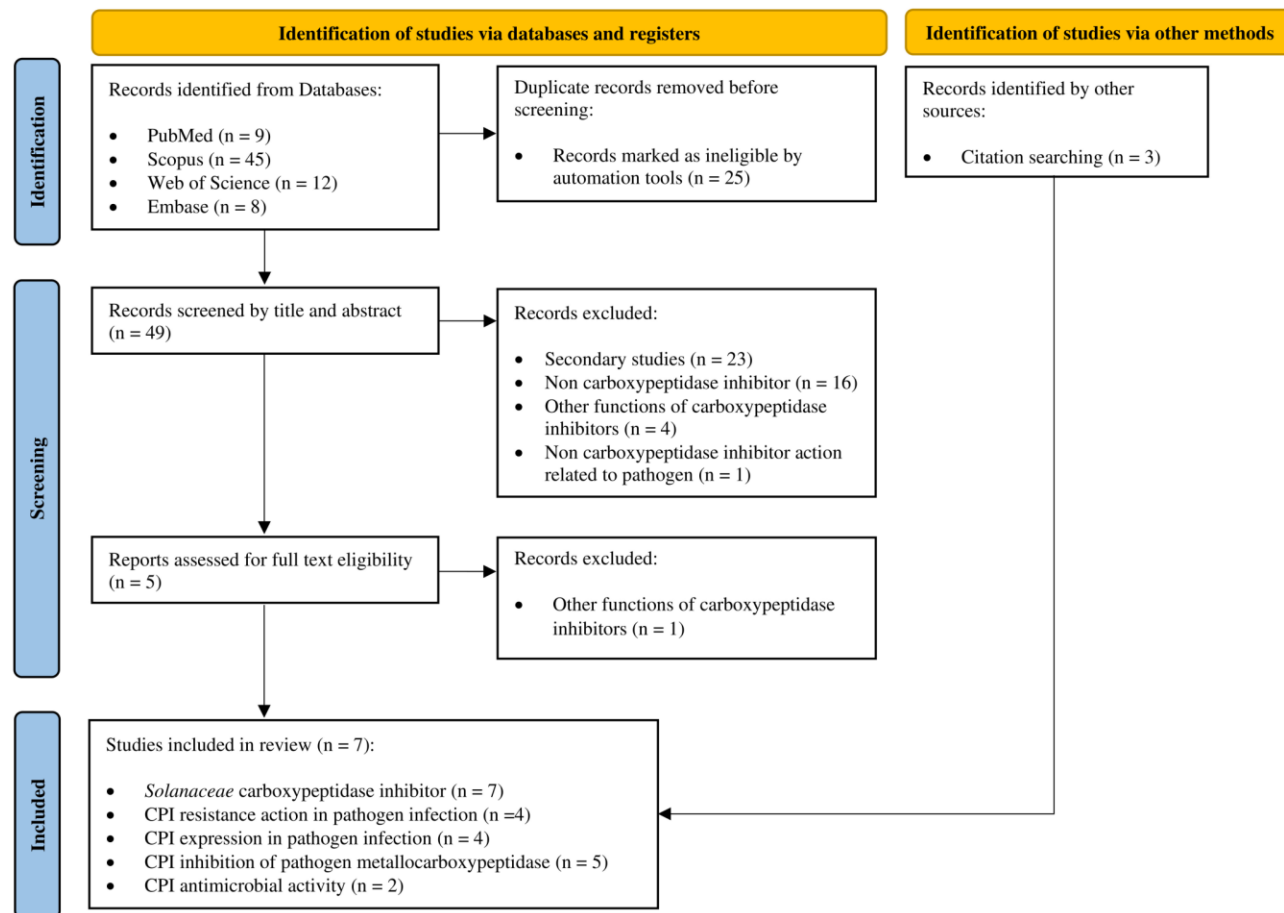

**Supplementary Figure S1** – Flow diagram of bibliographic search strategy of studies related to *Solanaceae* CPIs activities against pathogens. The methodology followed an adaptation of PRISMA guidelines (Grimshaw et al., 2021).
